# Supplementary material
Source: PubMed Central journal article supplement (PMC6034645)
Supplement: blood842880-suppl1.pdf [file blood842880-suppl1.pdf]

## SUPPLEMENTARY DATA

**Supplementary Table 1.** Characteristics of the 3 largest lesions in the FL-HiR patients

| ID | Lesion 1  | PPD <sup>1</sup> | Map <sup>2</sup> | PET <sup>3</sup> | Lytic | Lesion 2    | PPD <sup>1</sup> | Map <sup>2</sup> | PET <sup>3</sup> | Lytic | Lesion 3    | PPD <sup>1</sup> | Map <sup>2</sup> | PET <sup>3</sup> | Lytic |
|----|-----------|------------------|------------------|------------------|-------|-------------|------------------|------------------|------------------|-------|-------------|------------------|------------------|------------------|-------|
| 1  | Rib cage  | 31.7             | 2                | +                | yes   | Sacrum      | 20.1             | 1                | +                | yes   | Scapula     | 13.5             | 0                | +                | no    |
| 2  | Sacrum    | 14.9             | 0                | +                | yes   | L5          | 14.7             | 1                | +                | yes   | Ilium       | 12.0             | 1                | +                | yes   |
| 3  | Lt ilium  | 14.8             | 1                | -                | yes   | Rib cage    | 6.6              | 2                | +                | yes   | Clavicle    | 6.0              | 3                | -                | yes   |
| 4  | Rib cage  | 7.1              | 2                | +                | yes   | Ilium       | 6.8              | 2                | +                | yes   | Iliac crest | 6.5              | 2                | +                | yes   |
| 5  | Humerus   | 13.7             | 3                | +                | yes   | Rib cage    | 6.8              | 1                | +                | yes   | L3          | 5.8              | 2                | +                | yes   |
| 6  | Rib cage  | 19.1             | 0                | ST               | yes   | L5          | 7.2              | 0                | +                | yes   | Rib cage    | 6.5              | 0                | ST               | yes   |
| 7  | Ilium     | 34.8             | 2                | +                | yes   | Rib cage    | 21.6             | 1                | ST               | yes   | Clavicle    | 8.1              | 2                | +                | yes   |
| 8  | Rt pelvis | 21.0             | 3                | +                | yes   | Femur       | 16.6             | 3                | +                | no    | Rib cage    | 8.0              | 3                | +                | yes   |
| 9  | Manubrium | 12.2             | 3                | -                | yes   | Scapula     | 11.5             | 0                | +                | yes   | Scapula     | 6.7              | 0                | -                | no    |
| 10 | Lt pelvis | 57.0             | 3                | +                | yes   | Femur       | 16.2             | 3                | +                | yes   | Femur       | 10.8             | 3                | +                | yes   |
| 11 | Rib cage  | 11.7             | 2                | +                | yes   | Rib cage    | 9.8              | 3                | +                | yes   | Rt pelvis   | 6.1              | 3                | +                | yes   |
| 12 | Sacrum    | 23.4             | 1                | +                | yes   | T12         | 6.2              | 1                | +                | yes   | Ilium       | 5.4              | 3                | +                | yes   |
| 13 | Rib cage  | 49.7             | 3                | +                | yes   | Ilium       | 29.1             | 3                | +                | yes   | Rib cage    | 14.0             | 3                | +                | yes   |
| 14 | Clavicle  | 21.4             | 3                | ST               | yes   | Clavicle    | 15.3             | 3                | +                | yes   | Sacrum      | 10.5             | 3                | ST               | yes   |
| 15 | Manubrium | 16.0             | 2                | ST               | yes   | Clavicle    | 10.7             | 0                | +                | yes   | Rib cage    | 8.2              | 2                | ST               | yes   |
| 16 | Sacrum    | 27.8             | 3                | +                | yes   | Iliac crest | 8.7              | 3                | +                | yes   | Manubrium   | 5.6              | 3                | +                | yes   |
| 17 | Humerus   | 16.7             | 2                | +                | yes   | Sacrum      | 7.8              | 2                | +                | yes   | Sacrum      | 7.4              | 2                | +                | yes   |
| 18 | Ilium     | 19.9             | 1                | +                | yes   | Sacrum      | 19.6             | 2                | +                | yes   | Ilium       | 9.0              | 2                | +                | no    |
| 19 | Ilium     | 14.0             | 2                | +                | yes   | Sacrum      | 11.2             | 2                | +                | yes   | Rib cage    | 5.3              | 2                | +                | no    |
| 20 | Sacrum    | 27.3             | 3                | +                | yes   | Acetabulum  | 13.0             | 3                | +                | yes   | Ischium     | 11.7             | 3                | +                | yes   |
| 21 | Rt pelvis | 94.3             | 1                | +                | yes   | Iliac crest | 16.8             | 2                | +                | yes   | Femur       | 9.9              | 3                | +                | no    |
| 22 | Rib cage  | 40.7             | 3                | +                | yes   | Sacrum      | 20.2             | 2                | +                | yes   | Manubrium   | 7.9              | 3                | ST               | yes   |
| 23 | Tibia     | 10.3             | 3                | ST               | no    | Femur       | 9.0              | 3                | ST               | no    | Ilium       | 6.0              | 2                | -                | no    |

| ID | Lesion 1   | PPD <sup>1</sup> | Map <sup>2</sup> | PET <sup>3</sup> | Lytic | Lesion 2    | PPD <sup>1</sup> | Map <sup>2</sup> | PET <sup>3</sup> | Lytic | Lesion 3   | PPD <sup>1</sup> | Map <sup>2</sup> | PET <sup>3</sup> | Lytic |
|----|------------|------------------|------------------|------------------|-------|-------------|------------------|------------------|------------------|-------|------------|------------------|------------------|------------------|-------|
| 24 | Ilium      | 39.3             | 1                | +                | yes   | Rib cage    | 20.4             | 1                | +                | yes   | Ilium      | 9.3              | 1                | ST               | yes   |
| 25 | Humerus    | 16.4             | 3                | +                | yes   | Scapula     | 14.7             | 3                | +                | yes   | Sternum    | 8.6              | 3                | +                | yes   |
| 26 | Sacrum     | 47.4             | 2                | ST               | yes   | Ilium       | 18.0             | 2                | ST               | yes   | Ilium      | 13.9             | 2                | ST               | yes   |
| 27 | Ischium    | 9.1              | 2                | ST               | yes   | Manubrium   | 7.8              | 2                | -                | yes   | Rib cage   | 5.0              | 1                | ST               | yes   |
| 28 | Ilium      | 17.8             | 0                | +                | yes   | Humerus     | 11.9             | 3                | +                | yes   | Acetabulum | 6.8              | 2                | +                | yes   |
| 29 | Scapula    | 22.1             | 0                | +                | yes   | Humerus     | 18.6             | 1                | +                | yes   | L1         | 11.5             | 2                | +                | yes   |
| 30 | Ilium      | 20.4             | 0                | +                | yes   | Ilium       | 16.7             | 0                | +                | yes   | Clavicle   | 7.8              | 0                | +                | yes   |
| 31 | Ilium      | 20.2             | 1                | +                | yes   | T6          | 19.8             | 0                | +                | yes   | L2         | 5.4              | 0                | +                | yes   |
| 32 | Ischium    | 14.2             | 0                | +                | yes   | Iliac crest | 14.0             | 1                | +                | yes   | Ilium      | 9.4              | 0                | ST               | yes   |
| 33 | Ilium      | 11.2             | 3                | -                | yes   | L2          | 5.4              | 2                | -                | yes   | T11        | 5.3              | 2                | -                | yes   |
| 34 | T8         | 21.1             | 3                | +                | yes   | Iliac crest | 10.6             | 3                | +                | yes   | Femur      | 6.1              | 3                | +                | no    |
| 35 | Humerus    | 7.8              | 3                | +                | no    | Rib cage    | 6.1              | 2                | +                | yes   | Sacrum     | 5.1              | 2                | ST               | yes   |
| 36 | Acetabulum | 14.0             | 1                | +                | no    | Sacrum      | 10.2             | 0                | +                | no    | Manubrium  | 9.5              | 3                | +                | yes   |
| 37 | Sacrum     | 17.0             | DWI              | +                | yes   | Humerus     | 9.0              | DWI              | +                | yes   | Femur      | 7.6              | DWI              | +                | yes   |
| 38 | Humerus    | 21.8             | DWI              | +                | yes   | Ilium       | 16.0             | DWI              | +                | yes   | Scapula    | 7.4              | DWI              | +                | yes   |
| 39 | Femur      | 8.0              | DWI              | +                | no    | Sacrum      | 7.5              | DWI              | +                | no    | Humerus    | 7.4              | DWI              | +                | no    |
| 40 | L3         | 22.6             | DWI              | +                | yes   | T9          | 8.4              | DWI              | ST               | yes   | Manubrium  | 6.2              | DWI              | +                | yes   |
| 41 | Ilium      | 31.3             | DWI              | +                | yes   | Rt Sacrum   | 9.5              | DWI              | +                | yes   | Ilium      | 6.8              | DWI              | +                | yes   |
| 42 | C2-C4      | 18.4             | DWI              | +                | yes   | Rib cage    | 10.9             | DWI              | +                | yes   | Rib cage   | 7.8              | DWI              | +                | yes   |
| 43 | Sacrum     | 24.7             | DWI              | +                | yes   | Iliac crest | 15.0             | DWI              | +                | yes   | Femur      | 11.6             | DWI              | +                | yes   |
| 44 | Rib cage   | 29.0             | DWI              | +                | yes   | Iliac crest | 13.8             | DWI              | +                | yes   | Acetabulum | 13.8             | DWI              | +                | yes   |
| 45 | Sacrum     | 65.0             | DWI              | ST               | yes   | Ischium     | 13.3             | DWI              | ST               | yes   | Humerus    | 9.9              | DWI              | ST               | yes   |
| 46 | Ilium      | 12.9             | DWI              | +                | yes   | L1          | 5.5              | DWI              | +                | yes   | Humerus    | 5.0              | DWI              | +                | yes   |
| 47 | Scapula    | 13.9             | DWI              | +                | yes   | Scapula     | 9.0              | DWI              | +                | yes   | T7         | 8.3              | DWI              | +                | yes   |
| 48 | Sacrum     | 27.6             | DWI              | +                | yes   | Rib cage    | 11.8             | DWI              | +                | yes   | Scapula    | 6.6              | DWI              | +                | yes   |
| 49 | Ilium      | 27.6             | DWI              | +                | yes   | T5          | 15.5             | DWI              | -                | no    | Ilium      | 5.4              | DWI              | +                | yes   |
| 50 | Rib cage   | 44.8             | DWI              | +                | yes   | Ilium       | 32.4             | DWI              | +                | yes   | Humerus    | 15.3             | DWI              | +                | no    |
| 51 | Sacrum     | 26.5             | DWI              | +                | yes   | Sternum     | 16.3             | DWI              | +                | yes   | Humerus    | 13.4             | DWI              | +                | no    |
| 52 | Ilium      | 17.3             | DWI              | +                | yes   | T4          | 11.7             | DWI              | +                | yes   | Rib cage   | 7.2              | DWI              | +                | yes   |

| ID | Lesion 1 | PPD <sup>1</sup> | Map <sup>2</sup> | PET <sup>3</sup> | Lytic | Lesion 2  | PPD <sup>1</sup> | Map <sup>2</sup> | PET <sup>3</sup> | Lytic | Lesion 3    | PPD <sup>1</sup> | Map <sup>2</sup> | PET <sup>3</sup> | Lytic |
|----|----------|------------------|------------------|------------------|-------|-----------|------------------|------------------|------------------|-------|-------------|------------------|------------------|------------------|-------|
| 53 | Sacrum   | 14.4             | DWI              | +                | no    | Rib cage  | 13.5             | DWI              | +                | yes   | Scapula     | 7.8              | DWI              | +                | yes   |
| 54 | Clavicle | 49.9             | DWI              | +                | yes   | Manubrium | 20.5             | DWI              | +                | yes   | Iliac crest | 9.8              | DWI              | +                | yes   |
| 55 | Ilium    | 19.6             | DWI              | +                | yes   | Sacrum    | 10.4             | DWI              | +                | yes   | Ischium     | 9.3              | DWI              | +                | yes   |
| 56 | Rib cage | 17.2             | DWI              | +                | yes   | L3        | 5.9              | DWI              | +                | yes   | Ilium       | 5.8              | DWI              | +                | yes   |

<sup>1</sup>PPD: product of the perpendicular diameters in cm<sup>2</sup>; <sup>2</sup> Classification for the level of restriction of lesions seen on EADC maps: 0 = no increased restriction (~signal from muscle tissue adjacent to the pelvis), 1 = increased restriction, but less than signal for diffuse infiltration at lumbar spine, 2 = equal to signal at lumbar spine, 3 = above signal at lumbar spine; <sup>3</sup> Presentation of lesions on PET-CT: + = FDG avid lesion; ST = no focal hypermetabolism but soft tissue tumor in the CT portion of the PET-CT; - = PET-CT negative

**Supplementary Table 2.** Univariate analysis of risk factors for outcome in newly diagnosed patients.

| Variable         |      | No. | PFS  |              |        | OS   |               |        |
|------------------|------|-----|------|--------------|--------|------|---------------|--------|
|                  |      |     | HR   | 95% CI       | p      | HR   | 95% CI        | p      |
| <b>FL-HiR</b>    | no   | 348 |      |              |        |      |               |        |
|                  | yes  | 56  | 3.00 | 2.14 to 4.19 | <0.001 | 3.02 | 1.97 to 4.62  | <0.001 |
| <b>FL Number</b> | ≤8   | 206 |      |              |        |      |               |        |
|                  | >8   | 198 | 1.51 | 1.13 to 2.1  | 0.005  | 1.72 | 1.17 to 2.54  | 0.006  |
| <b>GEP70</b>     | low  | 349 |      |              |        |      |               |        |
|                  | high | 55  | 2.84 | 2.01 to 4.01 | <0.001 | 4.48 | 3.00 to 6.69  | <0.001 |
| <b>R-ISS</b>     | I    | 76  |      |              |        |      |               |        |
|                  | II   | 277 | 2.53 | 1.55 to 4.14 | <0.001 | 3.24 | 1.49 to 7.02  | 0.003  |
|                  | III  | 46  | 4.13 | 2.30 to 7.41 | <0.001 | 8.45 | 3.66 to 19.49 | <0.001 |
| <b>EMD</b>       | no   | 381 |      |              |        |      |               |        |
|                  | yes  | 23  | 2.29 | 1.39 to 3.78 | 0.001  | 3.78 | 2.19 to 6.53  | <0.001 |
| <b>gain(1q)</b>  | no   | 236 |      |              |        |      |               |        |
|                  | yes  | 136 | 1.96 | 1.46 to 2.64 | <0.001 | 2.74 | 1.84 to 4.08  | <0.001 |

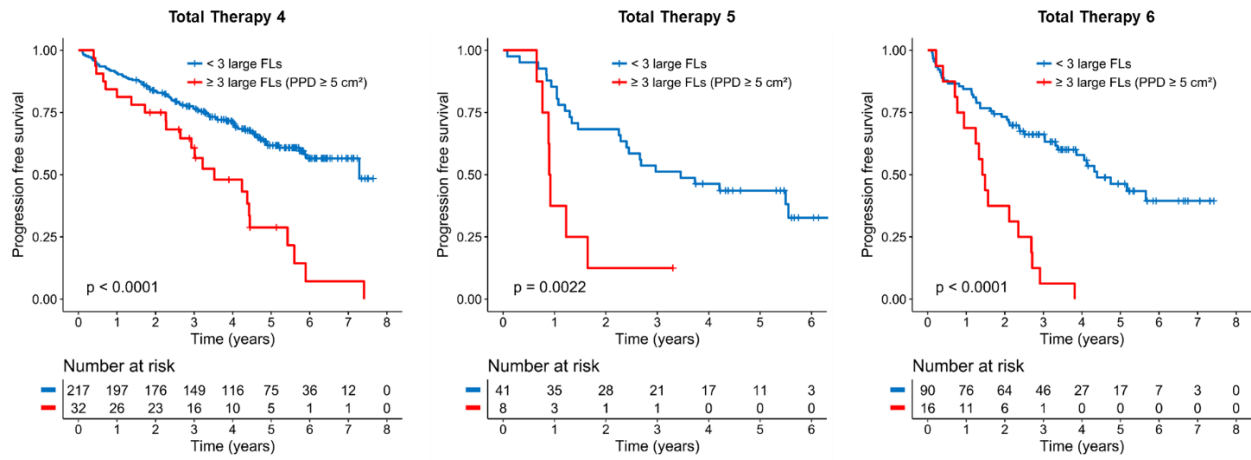

**Supplementary Figure 1: Impact of the FL-HiR pattern on outcome for Total Therapy 4 - 6.** Progression free survival for newly diagnosed MM patients enrolled into Total Therapies stratified by the presence of  $\geq 3$  large FLs. Statistical significance was determined using the log-rank test.

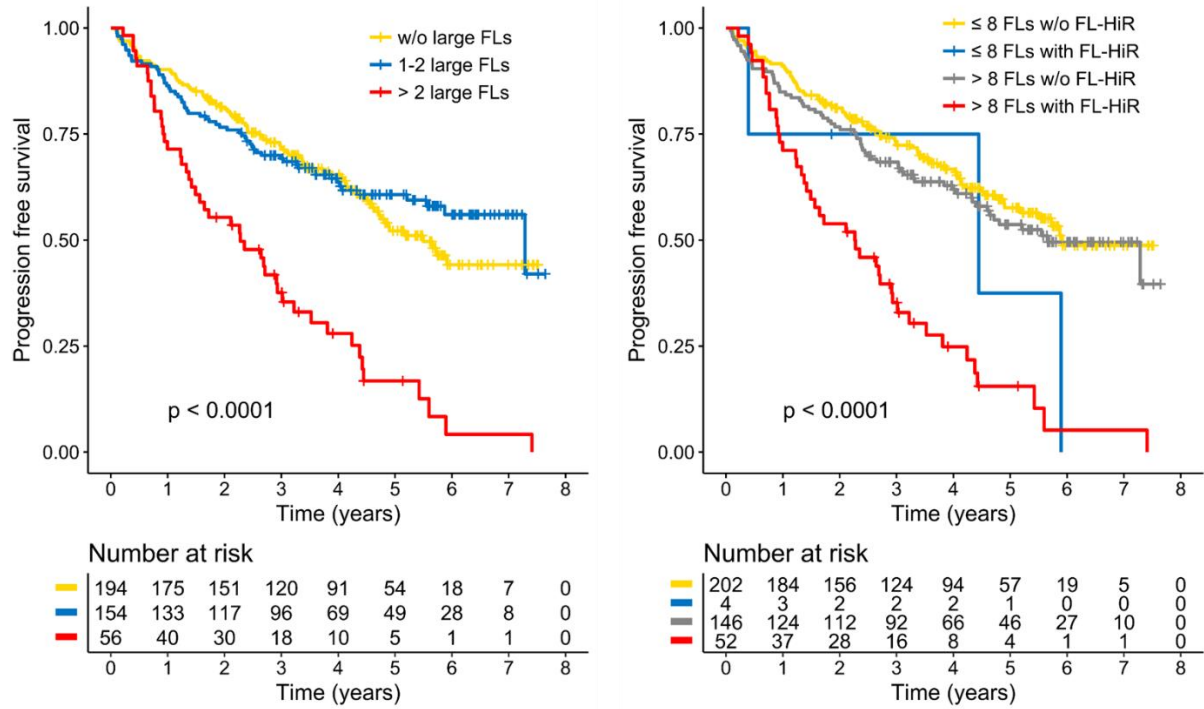

**Supplementary Figure 2: Impact of focal lesion number stratified by the FL-HiR pattern.** (Left panel) Progression free survival for patients with 1-2 large focal lesions vs.  $\geq 3$  large focal lesions. (Right panel) Progression free survival for patients with  $> 8$  focal lesions stratified by the FL-HiR pattern. Statistical significance was determined using the log-rank test.

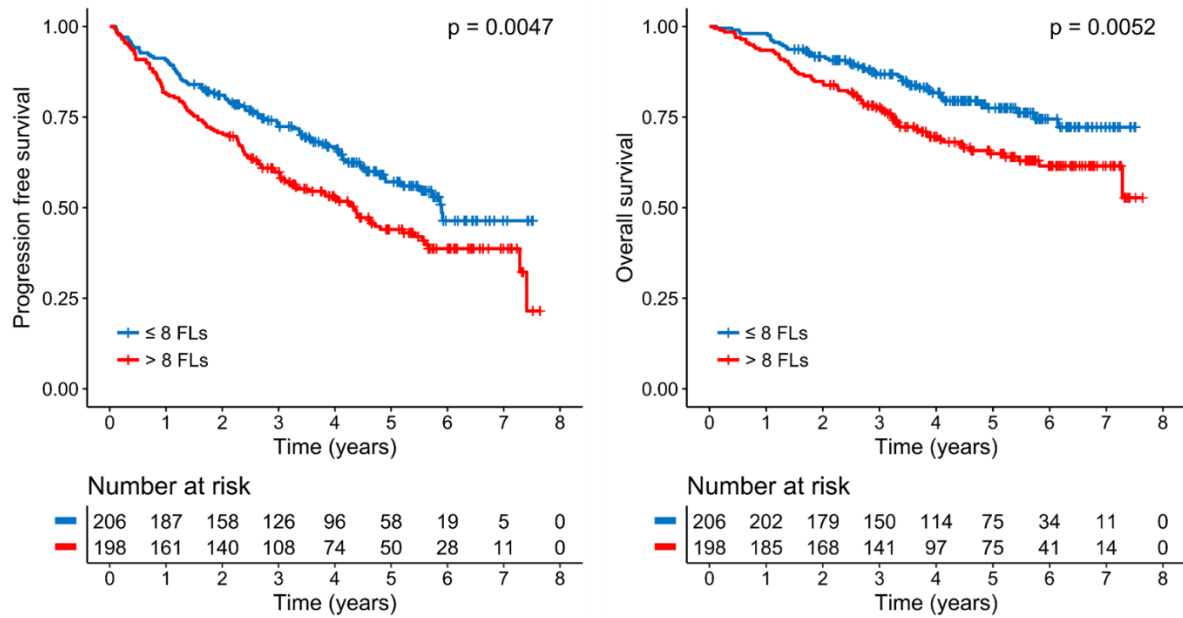

**Supplementary Figure 3: Impact of focal lesion number on DWIBS on outcome.** Progression free and overall survival for newly diagnosed MM patients enrolled into Total Therapies stratified by the number of focal lesions. Statistical significance was determined using the log-rank test.

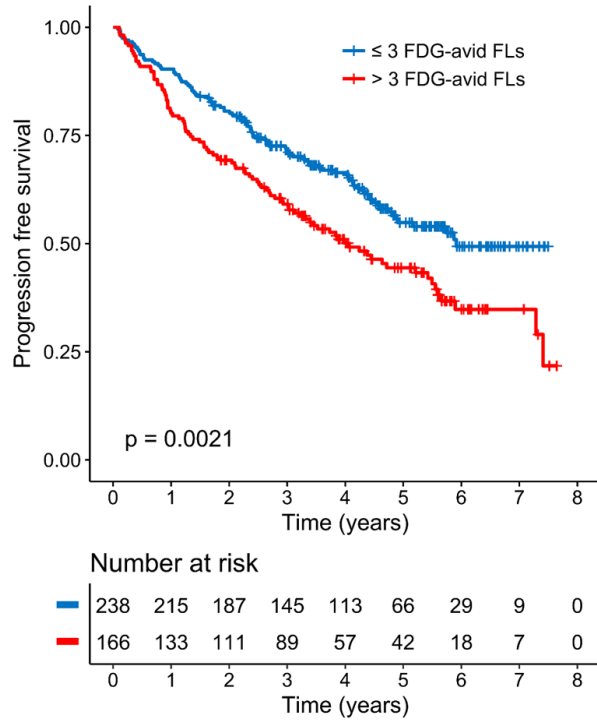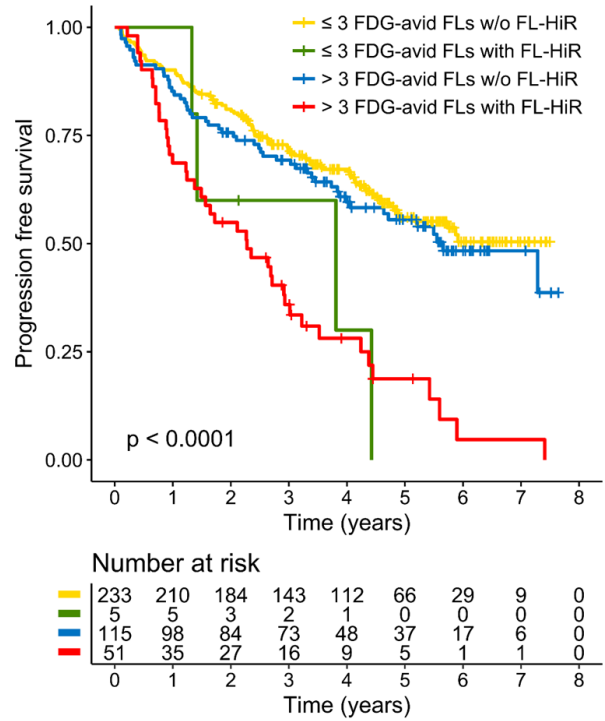

**Supplementary Figure 4: Impact of focal lesion number on PET-CT stratified by the FL-HiR pattern.** (Left panel) Progression free survival for patients stratified by the number of FDG-avid focal lesions. (Right panel) Progression free survival for patients with > 3 focal lesions on PET-CT stratified by the FL-HiR pattern on DWIBS. Statistical significance was determined using the log-rank test.



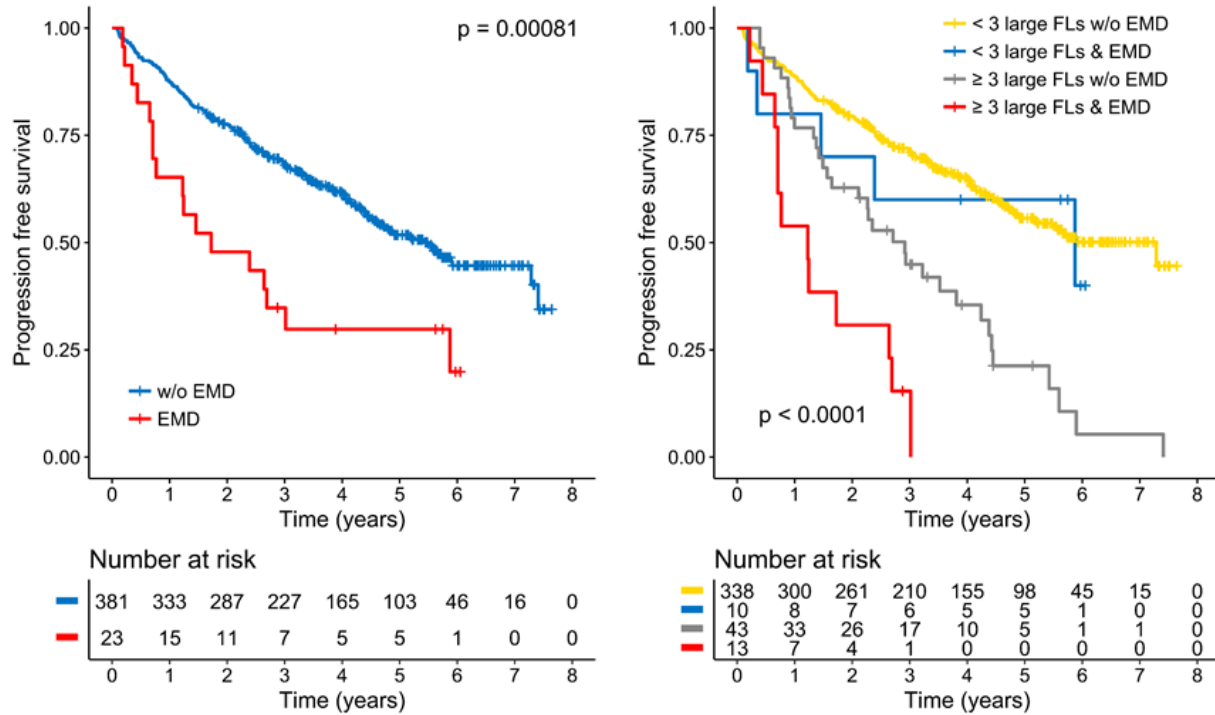

**Supplementary Figure 5: The impact of extramedullary disease on outcome.** Progression free survival for patients presenting with extramedullary disease (EMD) in PET-CT at baseline (left panel). Progression free survival for patients with EMD in PET-CT stratified by the presence of  $\geq 3$  large FLs (*FL-HiR* pattern). The log-rank test was used to calculate p values.

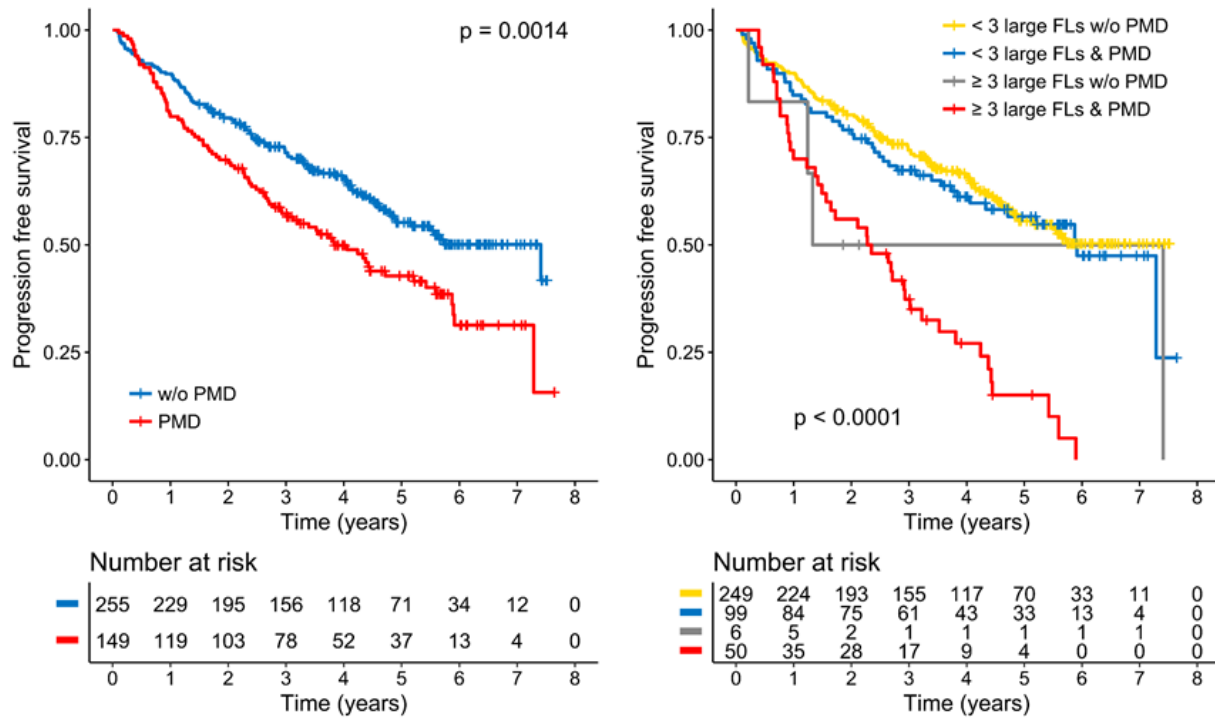

**Supplementary Figure 6: The impact of paramedullary disease on outcome.** Progression free survival for patients presenting with paramedullary (PMD) components in PET-CT (left panel). Progression free survival for patients with PMD in PET-CT stratified by the presence of  $\geq 3$  large FLs. The log-rank test was used to calculate p values.
